# Supplementary material
Source: publisher figshare collection journal article supplement (https://acs.figshare.com/ndownloader/files/9707890)
Supplement: Supplementary file 1 [file 9707890]

## **Boric acid induced transient cross-links in lactose-modified chitosan (Chitlac)**

Pasquale Sacco<sup>a</sup>, Franco Furlani<sup>a</sup>, Michela Cok<sup>a</sup>, Andrea Travan<sup>a</sup>, Massimiliano Borgogna<sup>a</sup>,

Eleonora Marsich<sup>b</sup>, Sergio Paoletti<sup>a</sup>, and Ivan Donati<sup>a,\*</sup>

<sup>a</sup> Department of Life Sciences, University of Trieste, Via Licio Giorgieri 5, I-34127 Trieste, Italy. <sup>b</sup>

Department of Medical, Surgical, and Health Sciences, Piazza dell'Ospitale 1, University of Trieste,  
I-34127 Trieste, Italy.

\* Corresponding author

e-mail: [idonati@units.it](mailto:idonati@units.it)

tel: +39 040 558 8733

## Supporting Information

Figure 1S

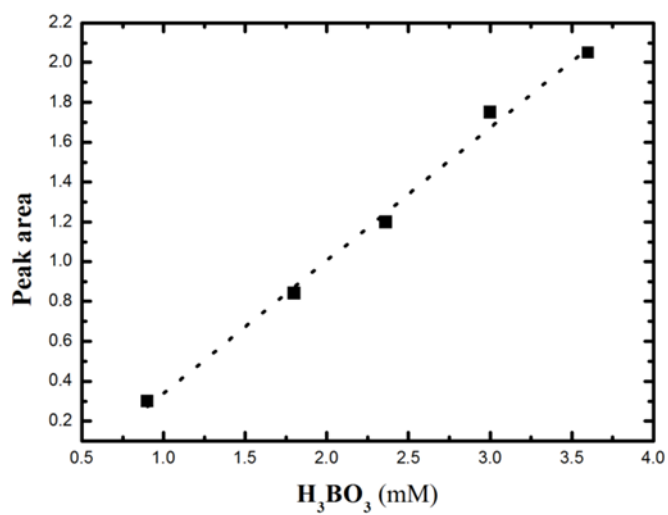

**Figure S1.** Calibration curve between the peak area (18.5 – 20 ppm) and the concentration of  $\text{H}_3\text{BO}_3$  to determine the amount of free borate ions.

**Figure S2**

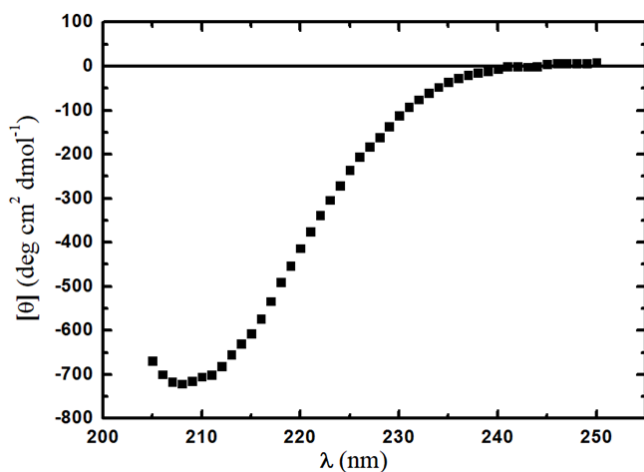

**Figure S2.** CD spectrum of Chitlac in PBS where NaCl was replaced by NaClO<sub>4</sub>.

**Figure S3**

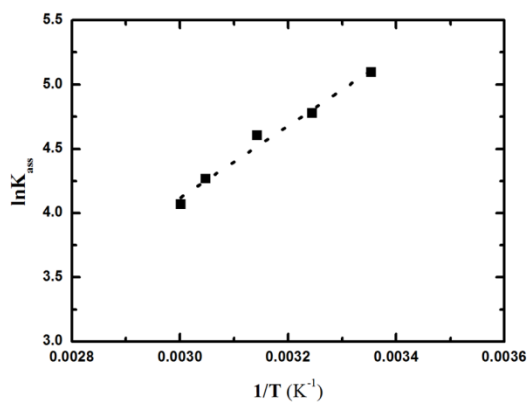

**Figure S3.** (■) Dependence of the association constant ( $K_{\text{ass}}$ ) from the inverse of the temperature for the boric acid treated chitlac as determined by means of  $^{11}\text{B}$ -NMR. Dotted line represents the linear best-fit of the experimental datapoints ( $R^2 = 0.98$ ). Conditions: PBS, pH 7.4.
